# Supplementary material for: Molecular recognition of sialoglycans by streptococcal Siglec-like adhesins: toward the shape of specific inhibitors
Source: Royal Society of Chemistry journal article supplement (doi:10.1039/d1cb00173f), 2021-01-01

## Supporting Figures

Figure S1

a

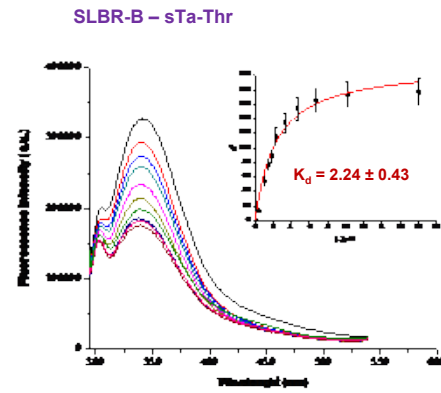

b

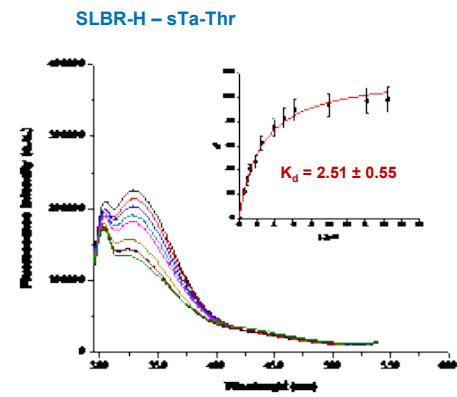

c

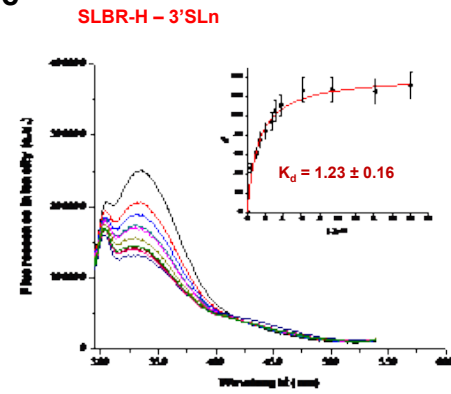

Figure S2

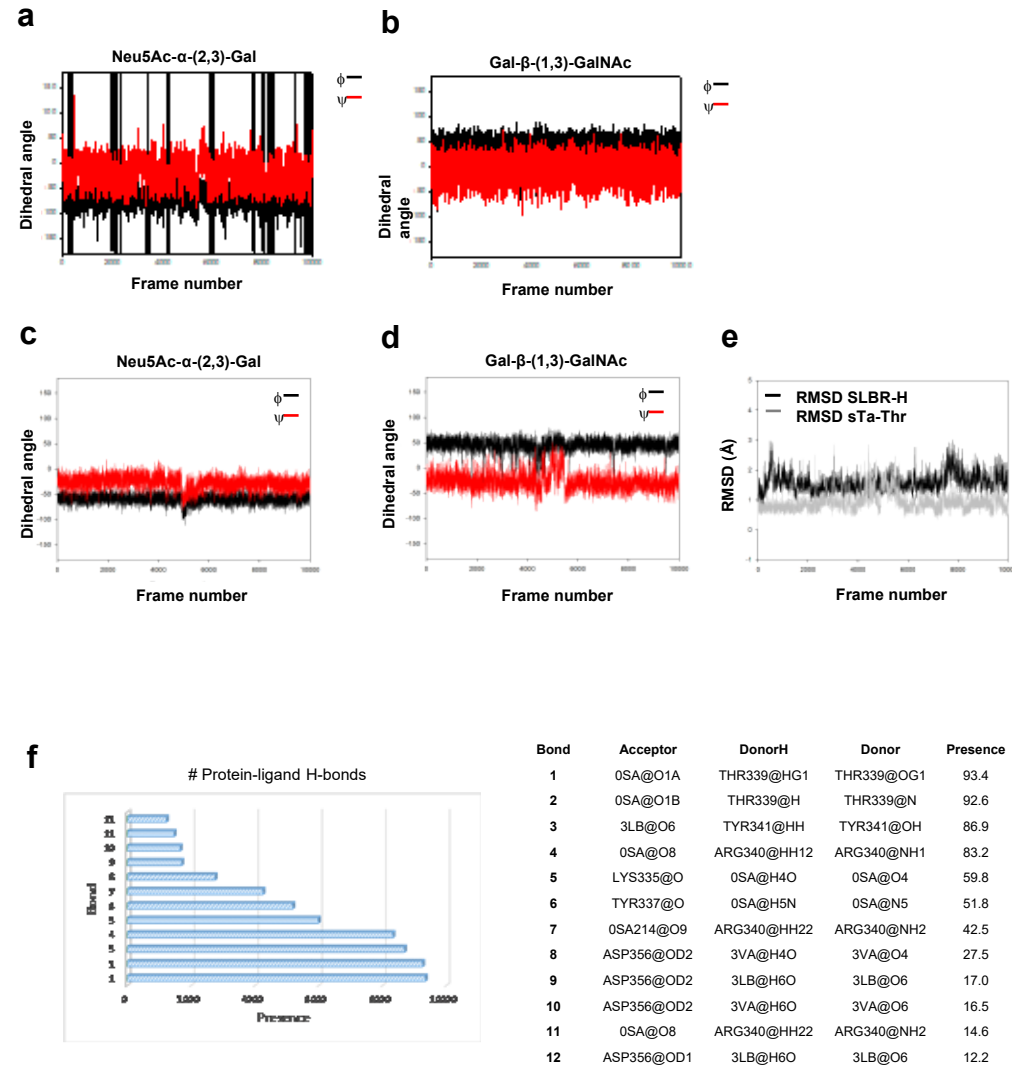

Figure S3

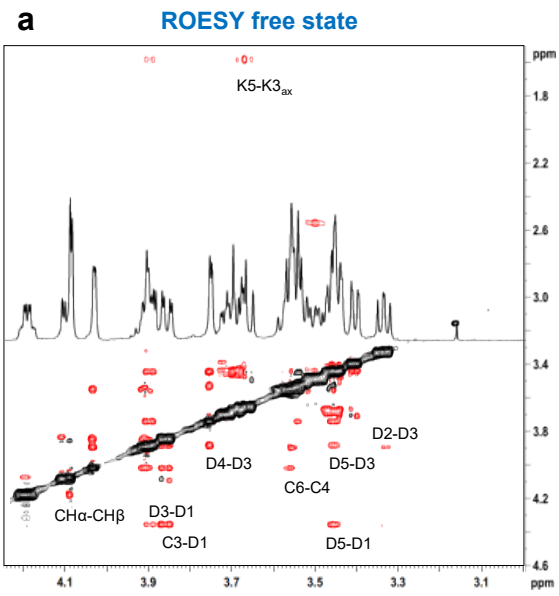

**b** Tr-NOESY SLBR-H – sTa-Thr

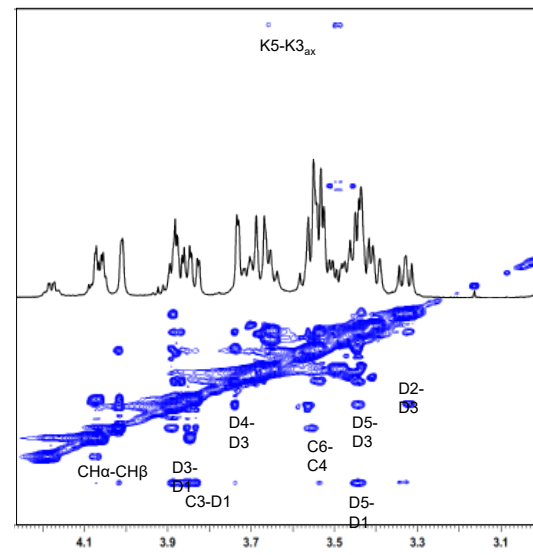

**c** Tr-NOESY SLBR-B – sTa-Thr

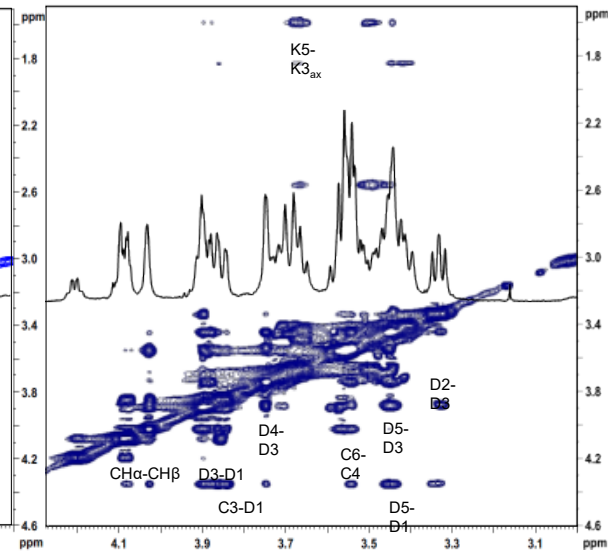

Figure S4

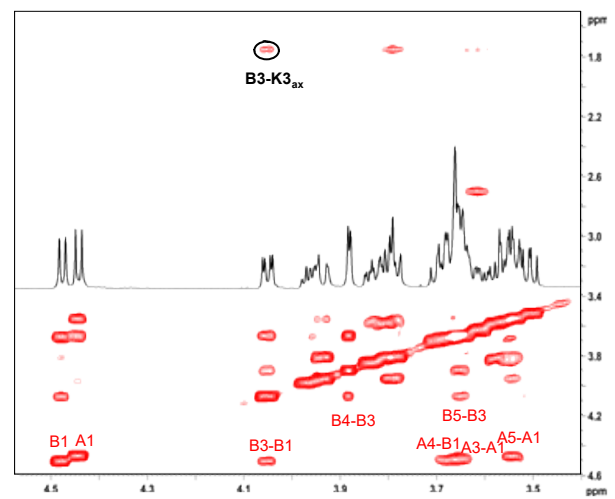

Figure S5

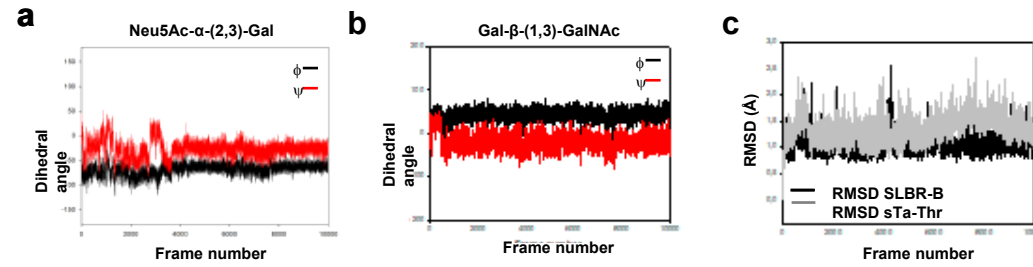

**d** # Protein-ligand H-bonds

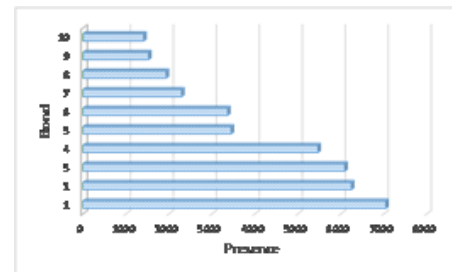

| Bond | Acceptor  | DonorH      | Donor      | Presence |
|------|-----------|-------------|------------|----------|
| 1    | ASP481@O  | 0SA@H5N     | 0SA@N5     | 70.4     |
| 2    | 0SA@O1A   | THR483@HG1  | THR483@OG1 | 62.4     |
| 3    | 0SA@O1B   | THR483@H    | THR483@N   | 60.9     |
| 4    | TYR485@OH | 3LB@H6O     | 3LB@O6     | 54.6     |
| 5    | 0SA@O9    | ARG484@HH22 | ARG484@NH2 | 34.4     |
| 6    | 0SA@O8    | ARG484@HH12 | ARG484@NH1 | 33.6     |
| 7    | 0SA@O1B   | THR483@HG1  | THR443@OG1 | 22.9     |
| 8    | 3VA@O2N   | TYR443@HH   | TYR443@OH  | 19.3     |
| 9    | 0SA@O1A   | THR483@H    | THR483@N   | 15.2     |
| 10   | ARG449@O  | 0SA@H9O     | 0SA@O9     | 14.0     |

Figure S6

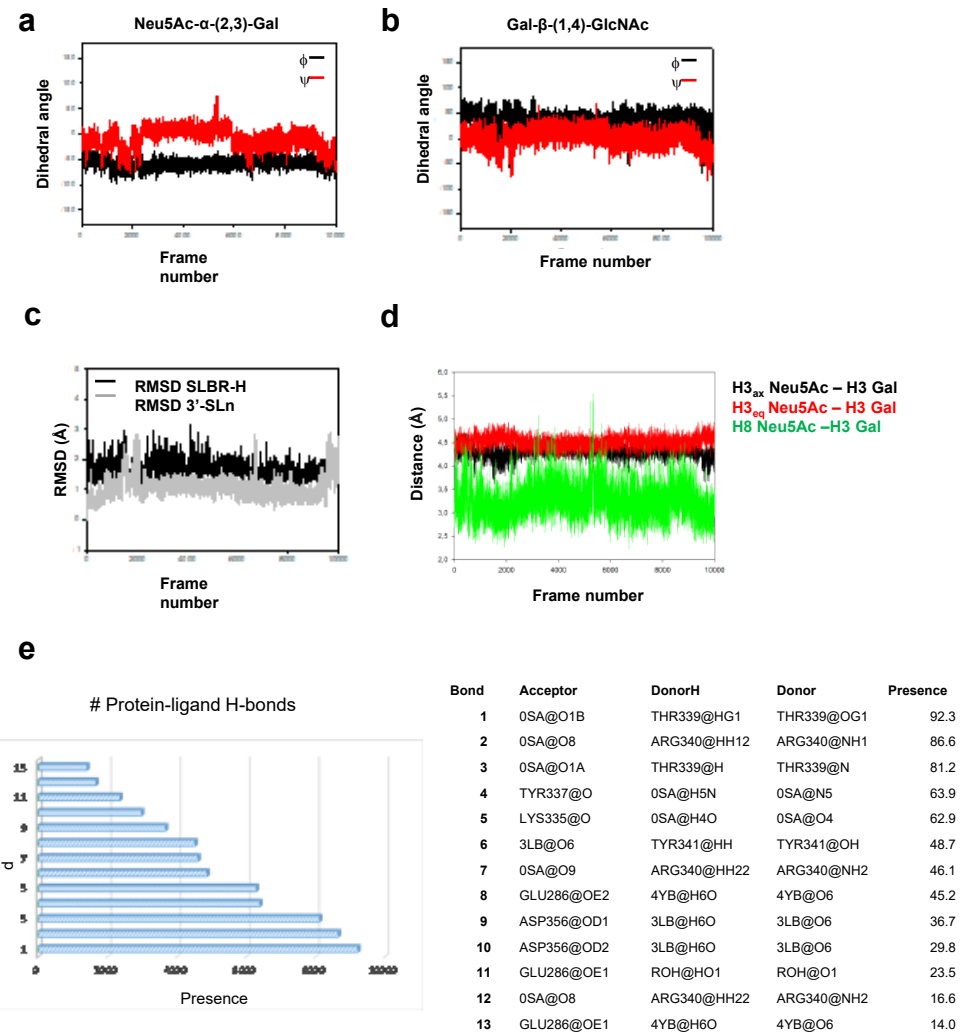

Figure S7

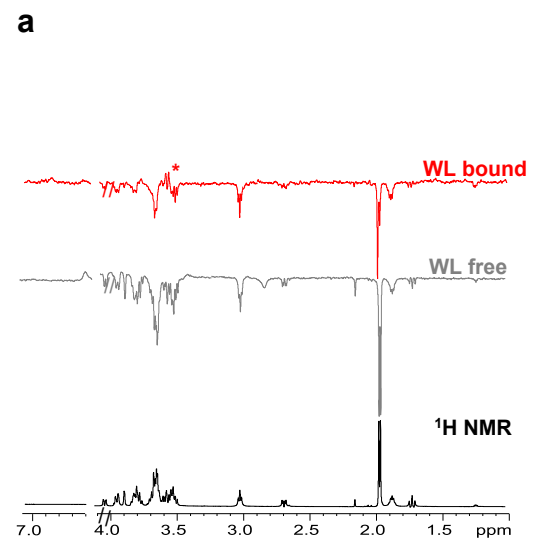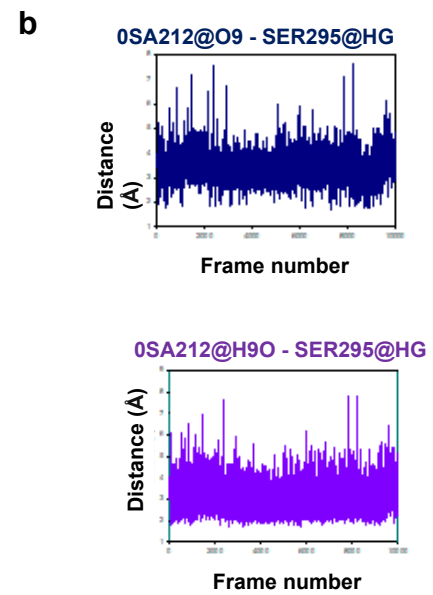



Figure S8

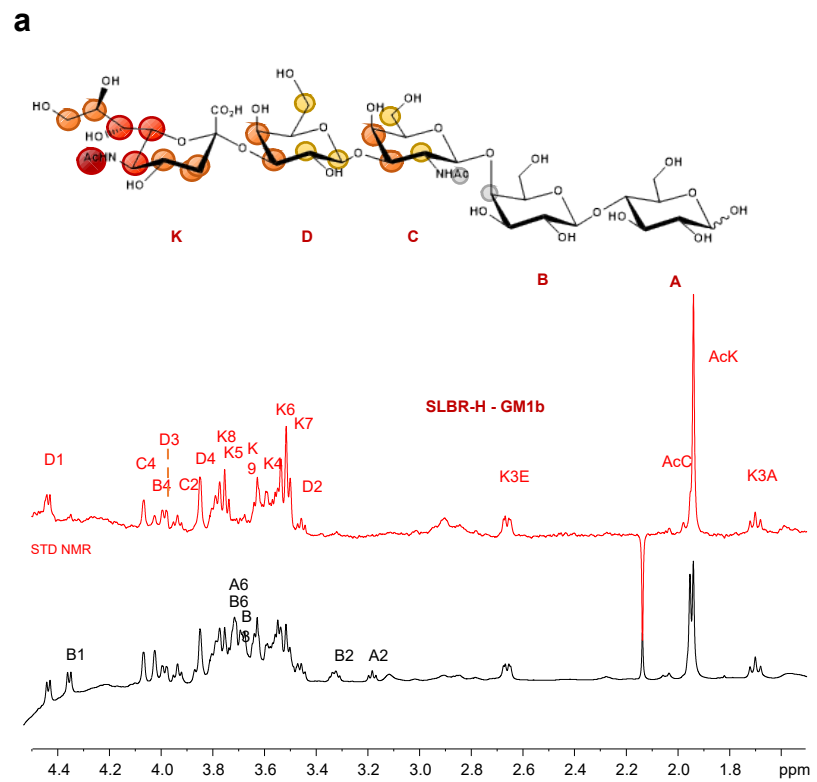

Figure S8

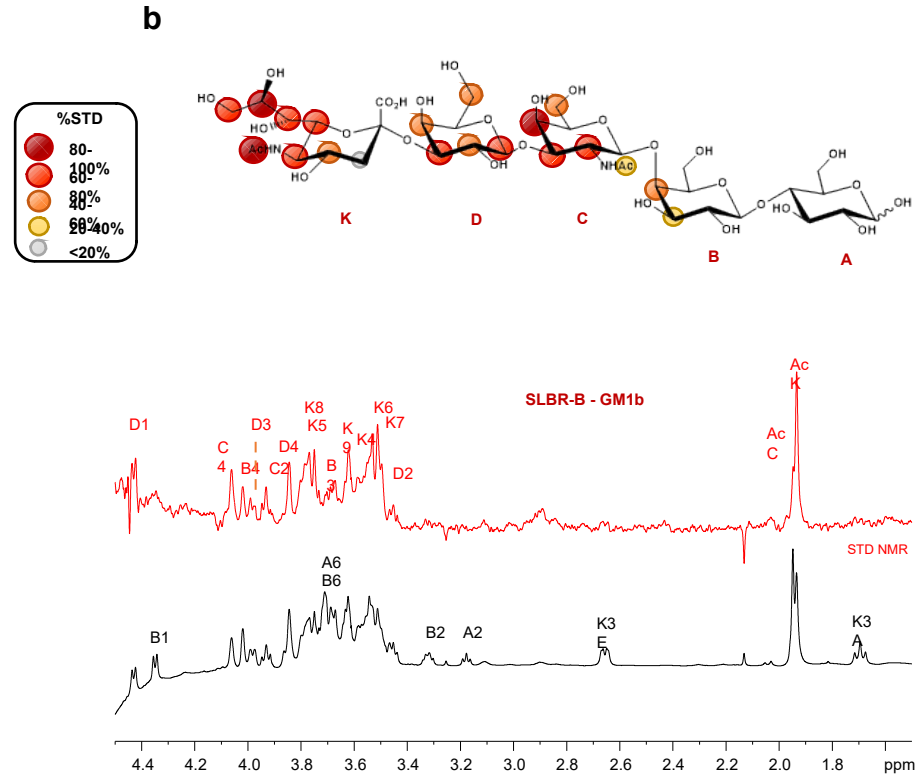

Figure S9

a) SLBR-H – GM1b

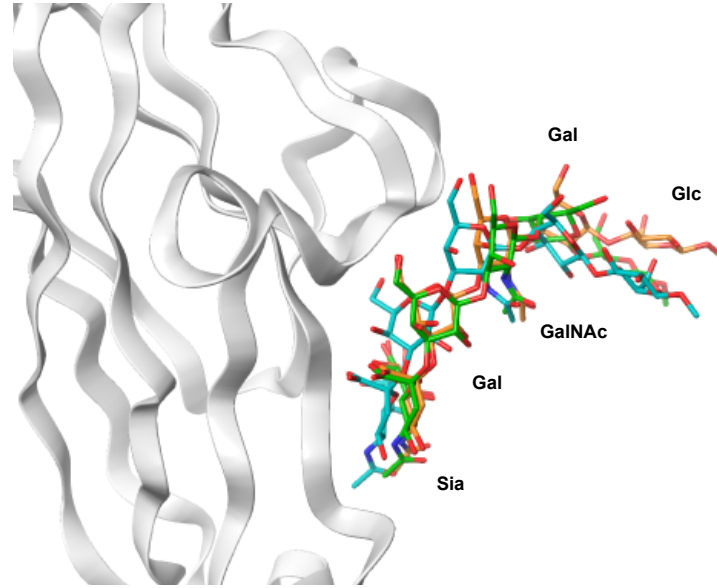

b) SLBR-B – GM1b

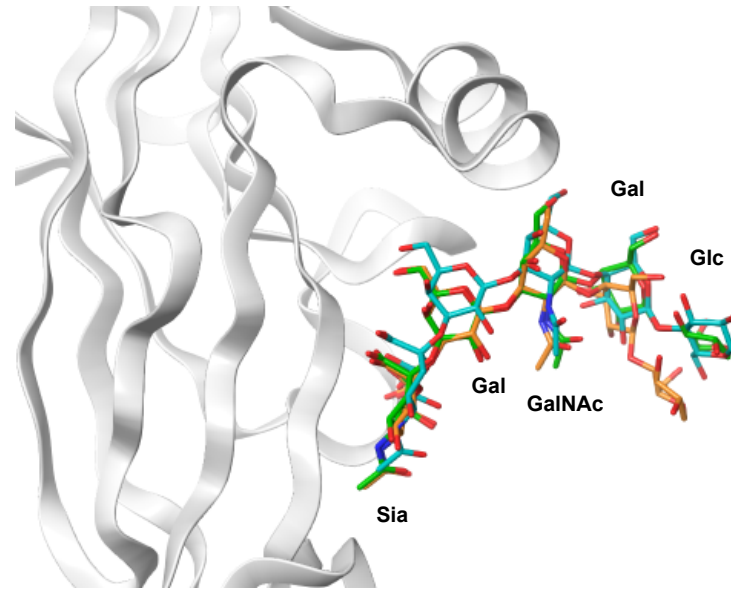

Figure S10

**a**

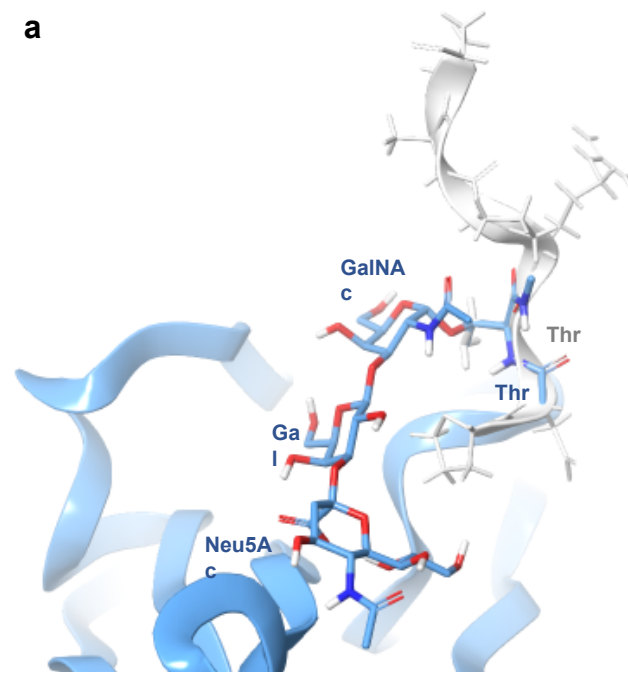

**b**

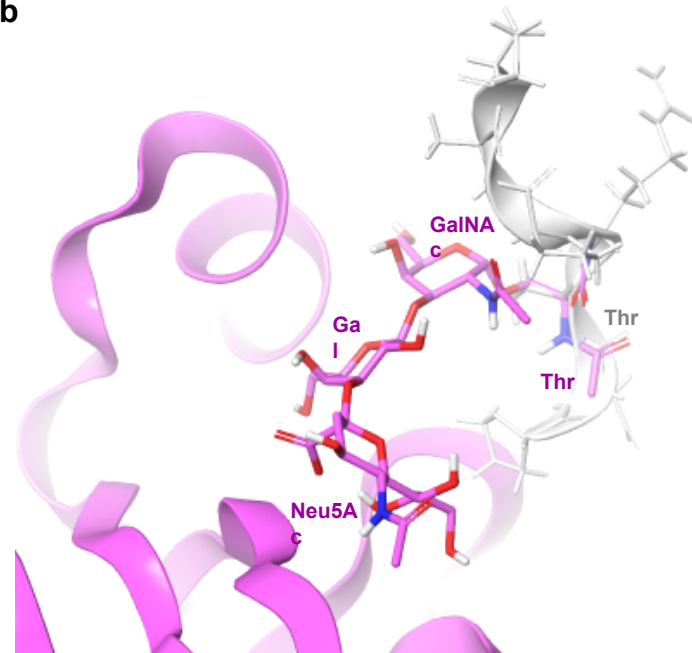

Figure S11

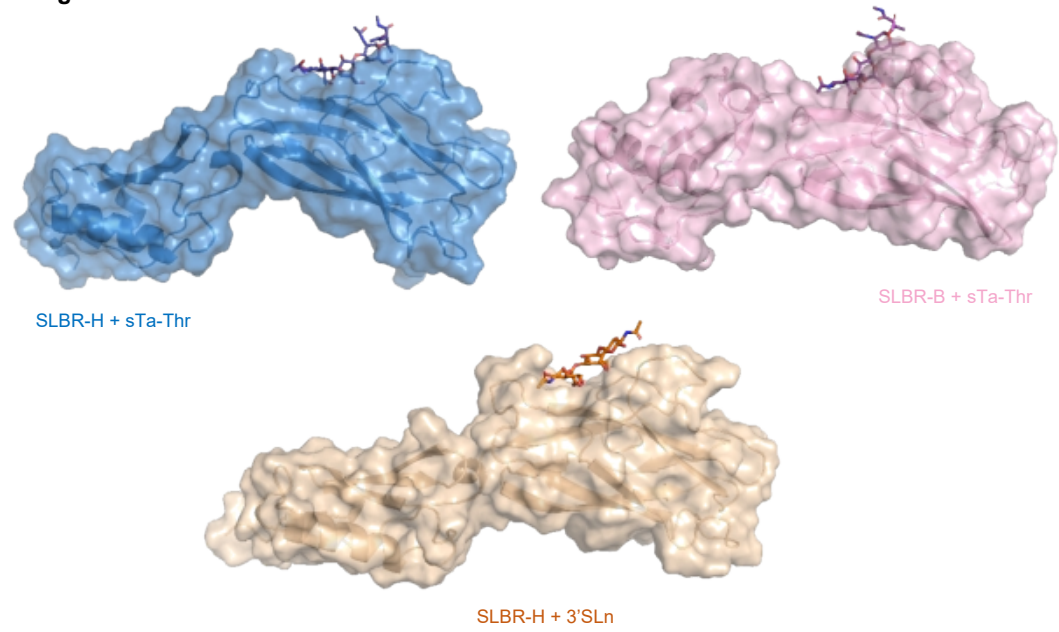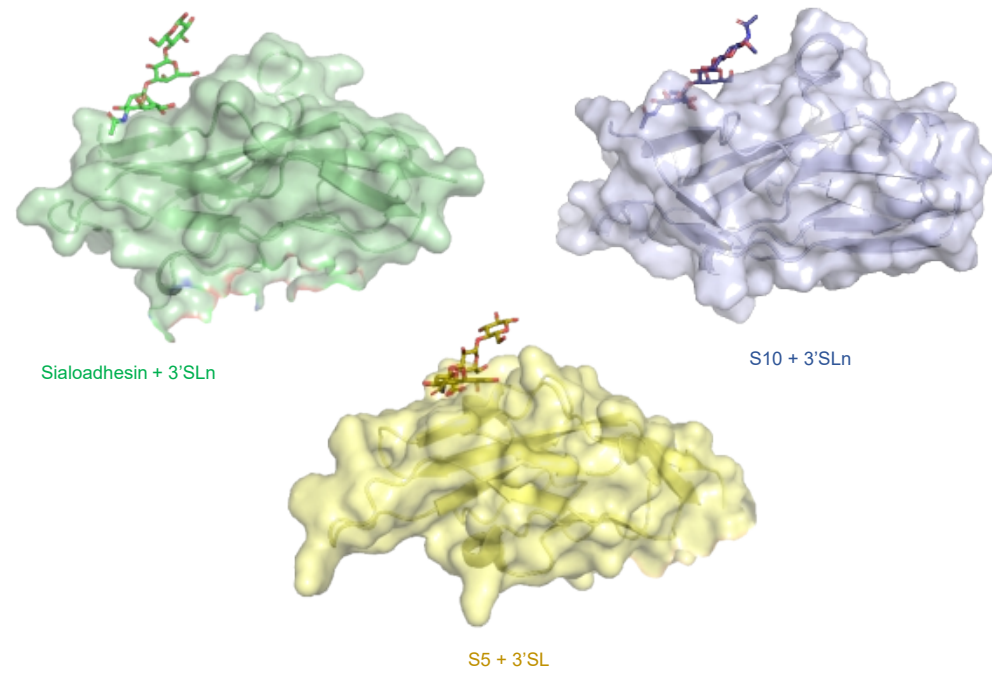

Supplement: d1cb00173f2.pdf [file d1cb00173f2.pdf]
